# Supplementary material
Source: MDPI journal article supplement (https://www.mdpi.com/2073-4441/12/12/3543)
Supplement: s1 [file s1 › water-1017250-supplementary.pdf]

## Supplementary materials

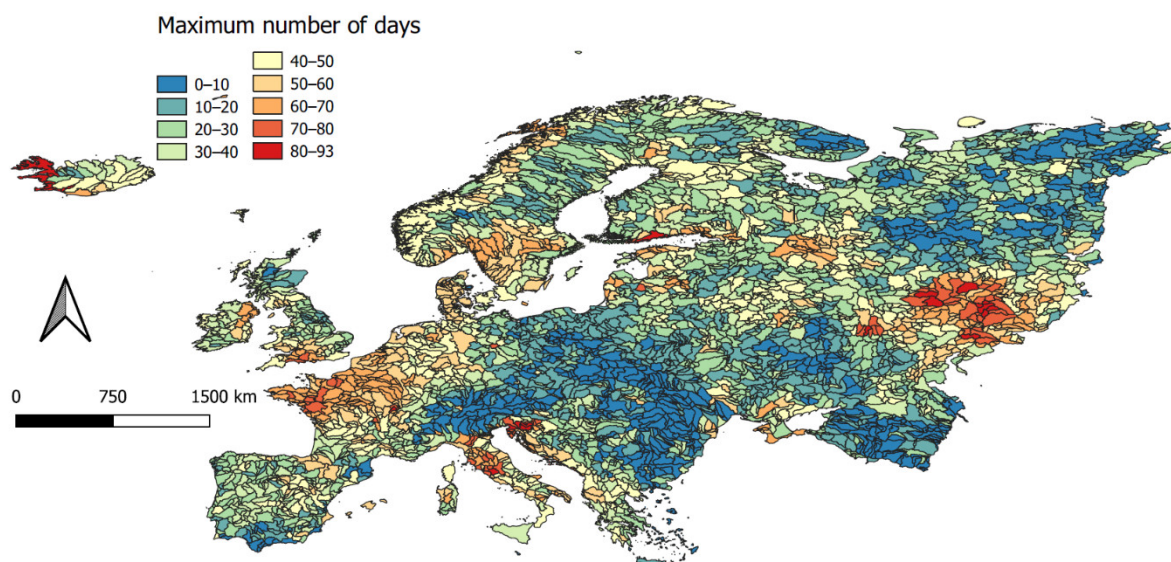

**Figure S1.** Maximum number of days with compound occurrence of drought and extreme-heat according to the basic case and 365 days used as the antecedent precipitation ( $N$ ).

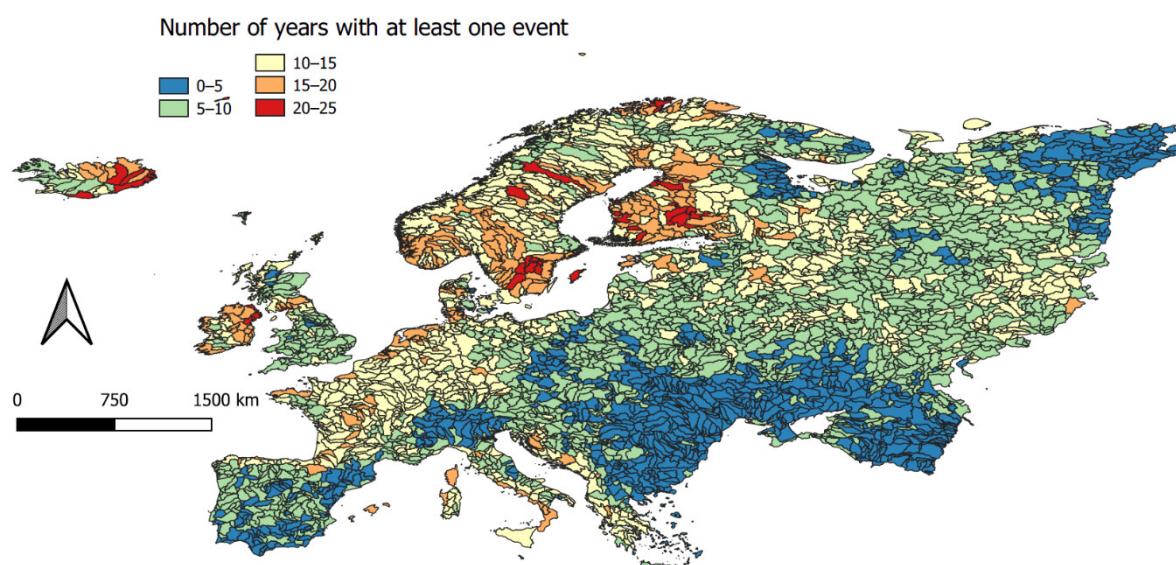

**Figure S2.** Number of years with at least one compound occurrence of drought and extreme-heat according to the basic case and 365 days used as the antecedent precipitation ( $N$ ).

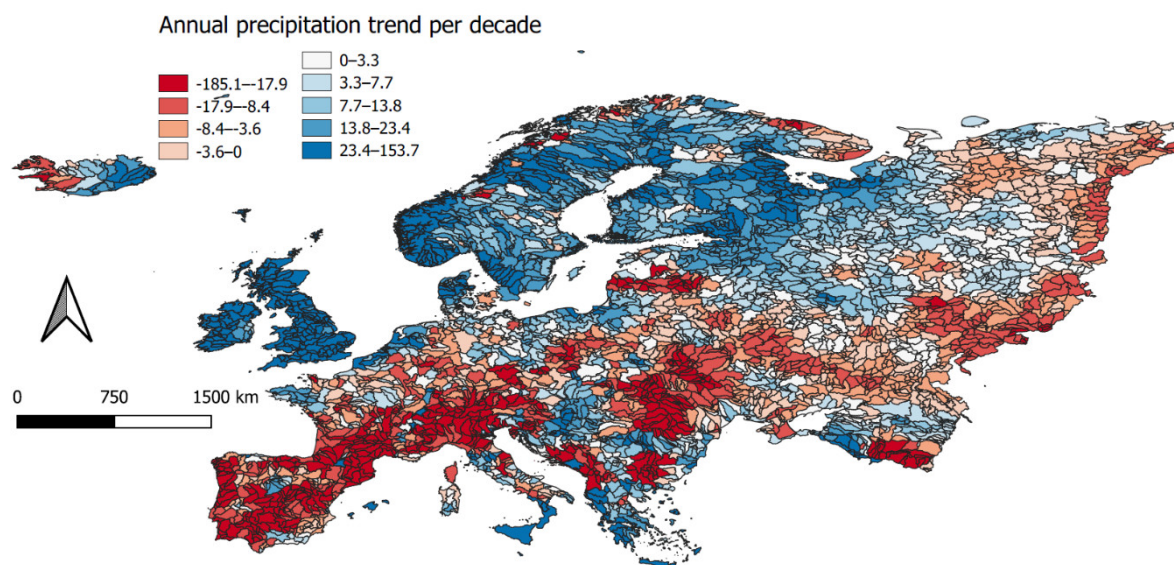

**Figure S3.** Annual precipitation trend per decade [mm] for the investigated period 1961–2018.

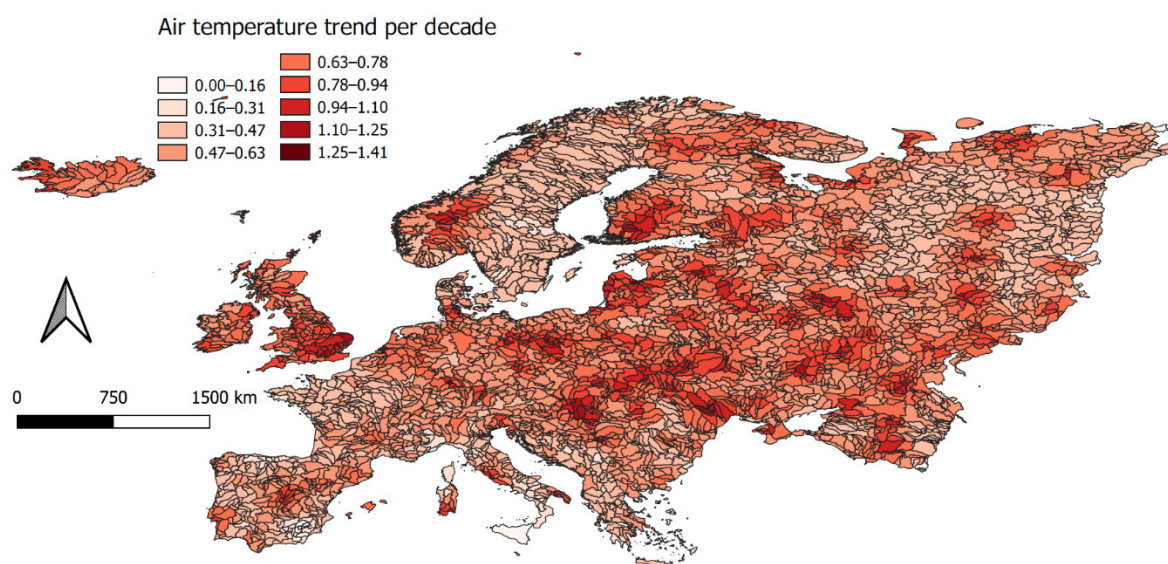

**Figure S4.** Air temperature trend per decade [K] for the investigated period 1961–2018.

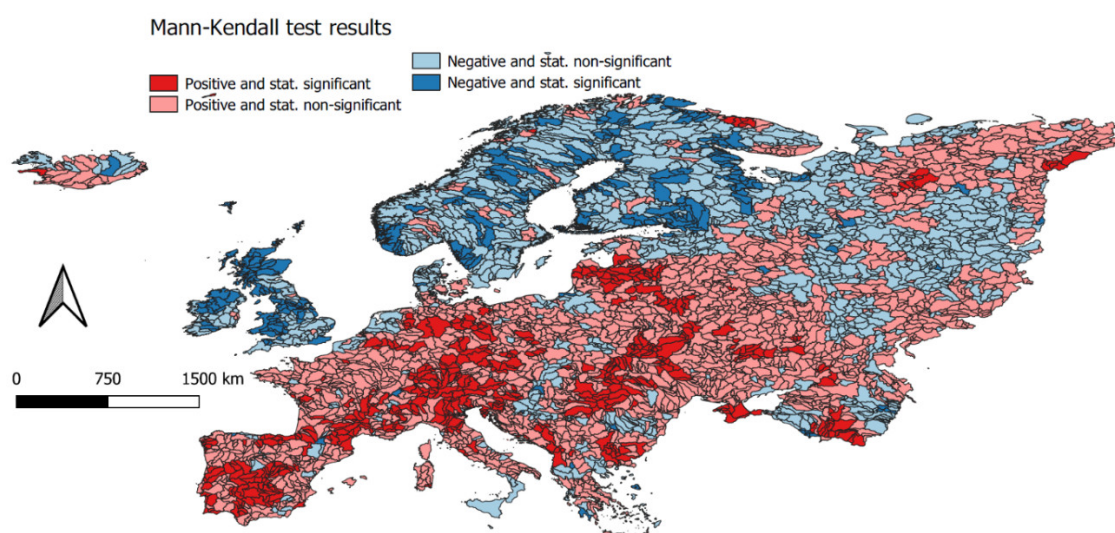

**Figure 5.** Mann-Kendall trend test results using mean annual number of days with compound occurrence of drought and extreme-heat in the 1961–2018 period. Results for the mild case and  $N=365$  days are presented.

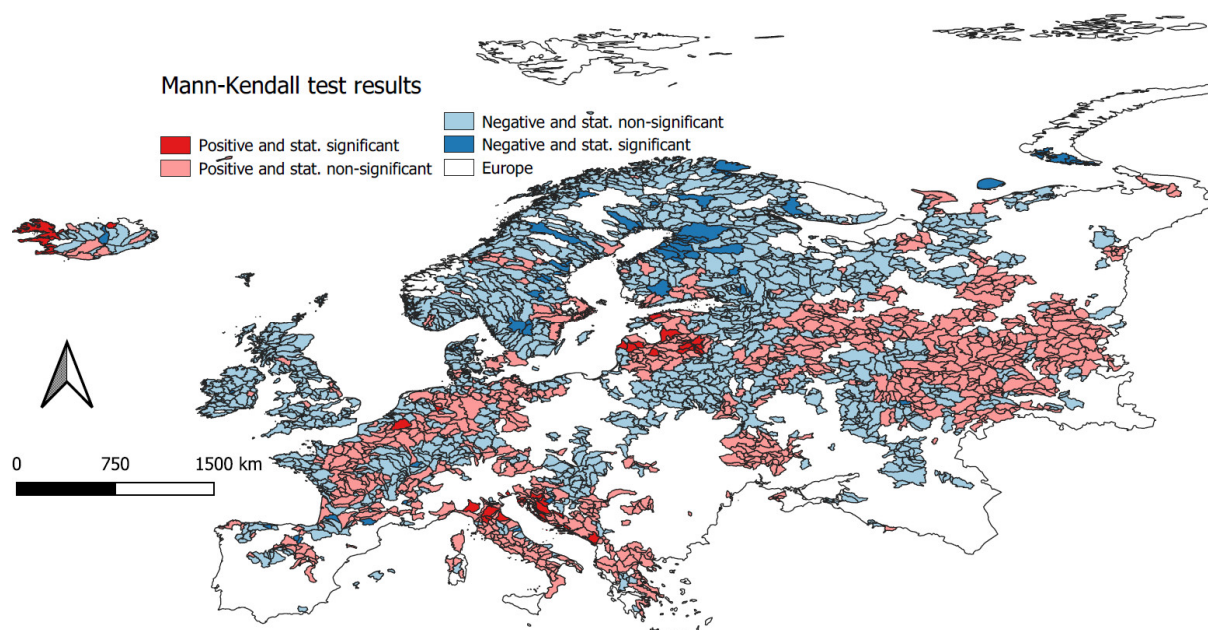

**Figure S6.** Mann-Kendall trend test results using mean annual number of days with compound occurrence of drought and extreme-heat in the 1961–2018 period. Results for the extreme case and  $N=365$  days are presented.

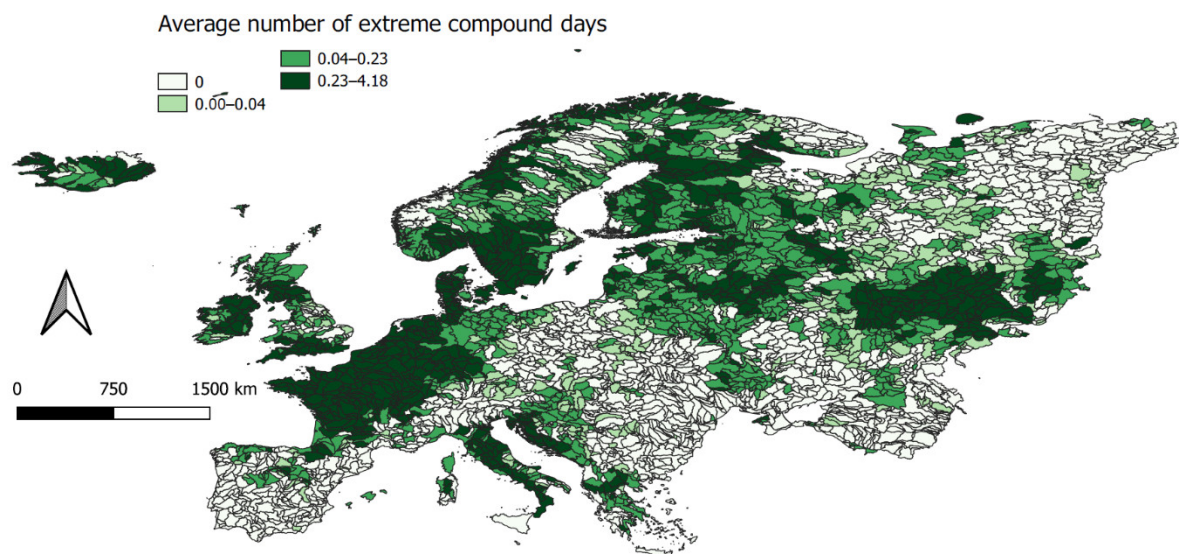

**Figure S7.** Mean annual number of days with compound occurrence of drought and extreme-heat according to the extreme case and 365 days used as the antecedent precipitation.
